# Supplementary material for: TEFM is a potent stimulator of mitochondrial transcription elongation in vitro
Source: Nucleic Acids Res. 2015 Feb 17;43(5):2615–24. doi: 10.1093/nar/gkv105 (PMC4357710; doi:10.1093/nar/gkv105)
Supplement: SUPPLEMENTARY DATA [file supp_gkv105_nar-03728-v-2014-File007.pdf]

## SUPPLEMENTARY DATA

### **TEFM is a potent stimulator of mitochondrial transcription elongation *in vitro***

Viktor Posse<sup>1</sup>, Saba Shahzad<sup>2,3</sup>, Maria Falkenberg<sup>1</sup>, B. Martin Hällberg<sup>2,3,4</sup>, Claes M. Gustafsson<sup>1,\*</sup>

From the <sup>1</sup>Department of Medical Biochemistry and Cell Biology, University of Gothenburg, SE-40530, Gothenburg, Sweden; <sup>2</sup>Department of Cell and Molecular Biology, Karolinska Institutet, SE-17177 Stockholm, Sweden; <sup>3</sup>Röntgen-Ångström-Cluster, Karolinska Institutet Outstation, Centre for Structural Systems Biology, DESY-Campus, D-22603 Hamburg, Germany; <sup>4</sup>European Molecular Biology Laboratory, Hamburg Unit, D-22603, Germany

\*To whom correspondence should be addressed: Claes M. Gustafsson, Department of Medical Biochemistry and Cell Biology, University of Gothenburg, SE-40530 Gothenburg, Sweden.  
e-mail: [claes.gustafsson@medkem.gu.se](mailto:claes.gustafsson@medkem.gu.se); ph. +46 31 7863826; fax. +46 31 416108

## **Materials and Methods**

Analytic gel filtration of TEFM was performed on a Superdex 200 5/150 GL column (GE Healthcare). The column was equilibrated in 300 mM NaCl, 20 mM Hepes pH 7.5, 10% glycerol and 1 mM TCEP. The molecular weight of TEFM was calculated using five protein standards spanning the separation interval of the column (Figure S1).

# Superdex200 5/150

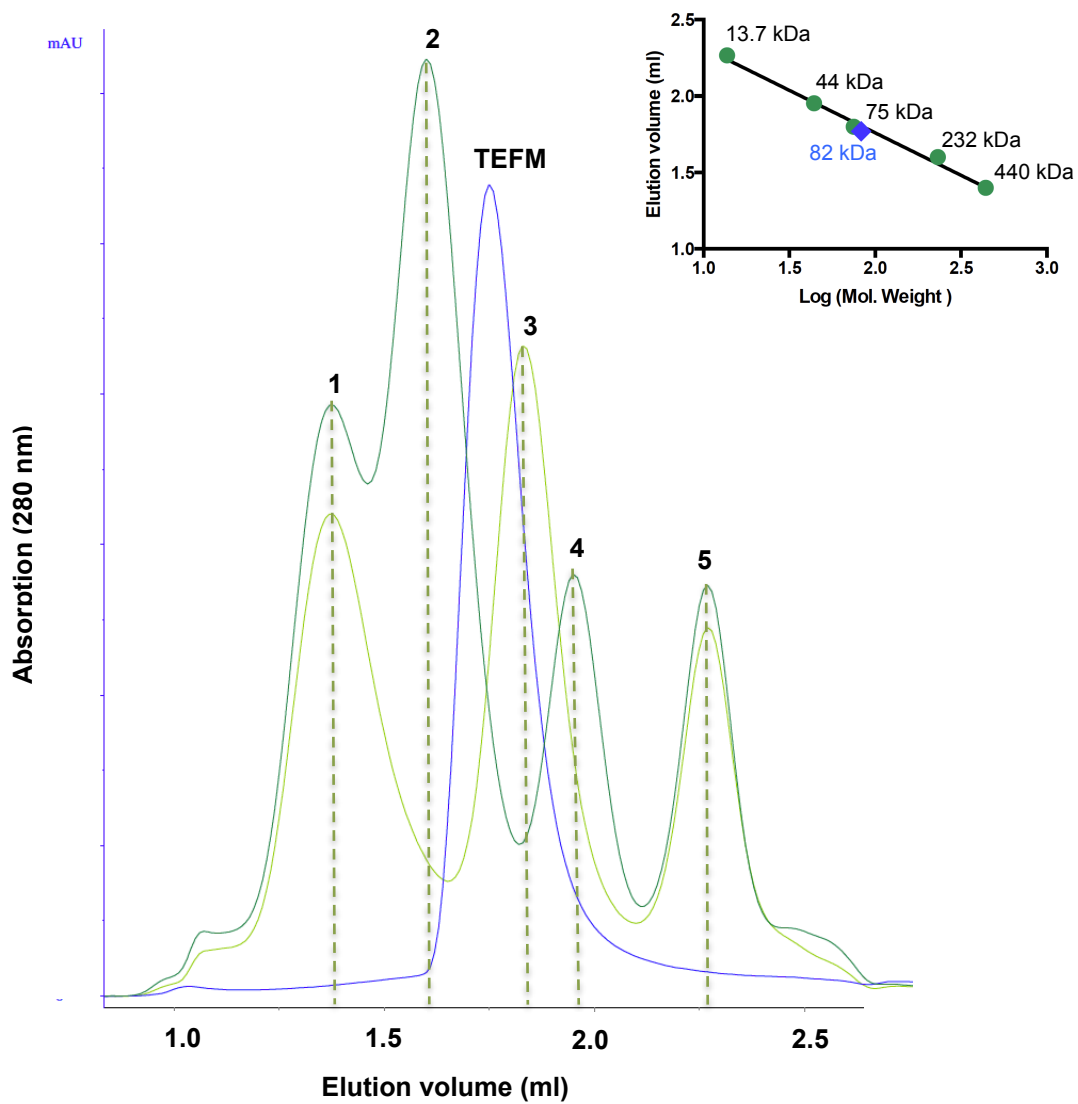

**Figure S1. Determination of quaternary structure of TEFM.** Analytical gel-filtration of TEFM was performed on a Superdex 200 5/150 GL column (GE Healthcare). Calibration of the column was performed using the following standards: 1. Ferritin (440 kDa), 2. Catalase (232 kDa), 3. Covalbumin (75 kDa), 4. Ovalbumin (44 kDa) and 5. Ribonuclease A (13.7 kDa).

## Supplementary Figure S2

**A**

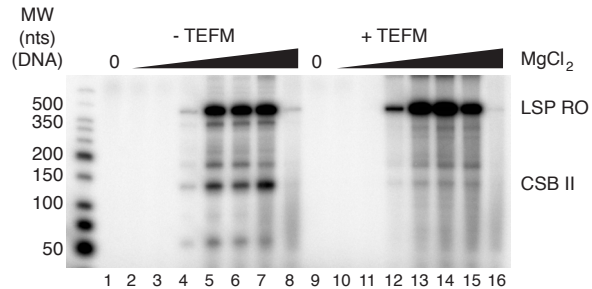

**B**

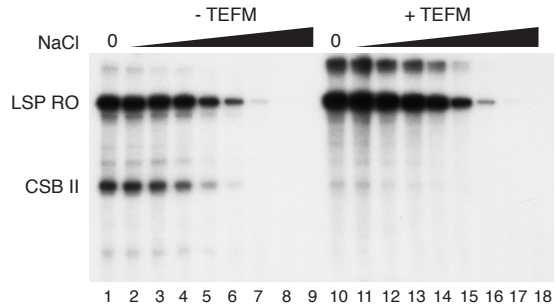

**Figure S2.** *In vitro* transcription from the LSP 400 nts run-off template with differing salt conditions. **(A)**  $\text{MgCl}_2$  curve with increasing concentrations in lane 1-8 (in the absence of TEFM) and 9-16 (in the presence of 40 nM TEFM),  $\text{MgCl}_2$  concentrations were 0, 0.5, 1, 2, 4, 8, 16 and 32 mM. LSP run-off, CSB II pre-terminated transcripts and MW marker (LMW ladder, New England Biolabs) are indicated. **(B)** NaCl curve with increasing concentrations in lane 1-9 (in the absence of TEFM) and 10-18 (in the presence of 40 nM TEFM), NaCl additions were 0, 20, 40, 60, 80, 100, 120, 140 and 160 mM. The present proteins contribute with around 10-20 mM NaCl in each reaction, salt contribution from TEFM has been compensated for. LSP run-off and CSB II pre-terminated transcripts are indicated.

# Supplementary Figure S3

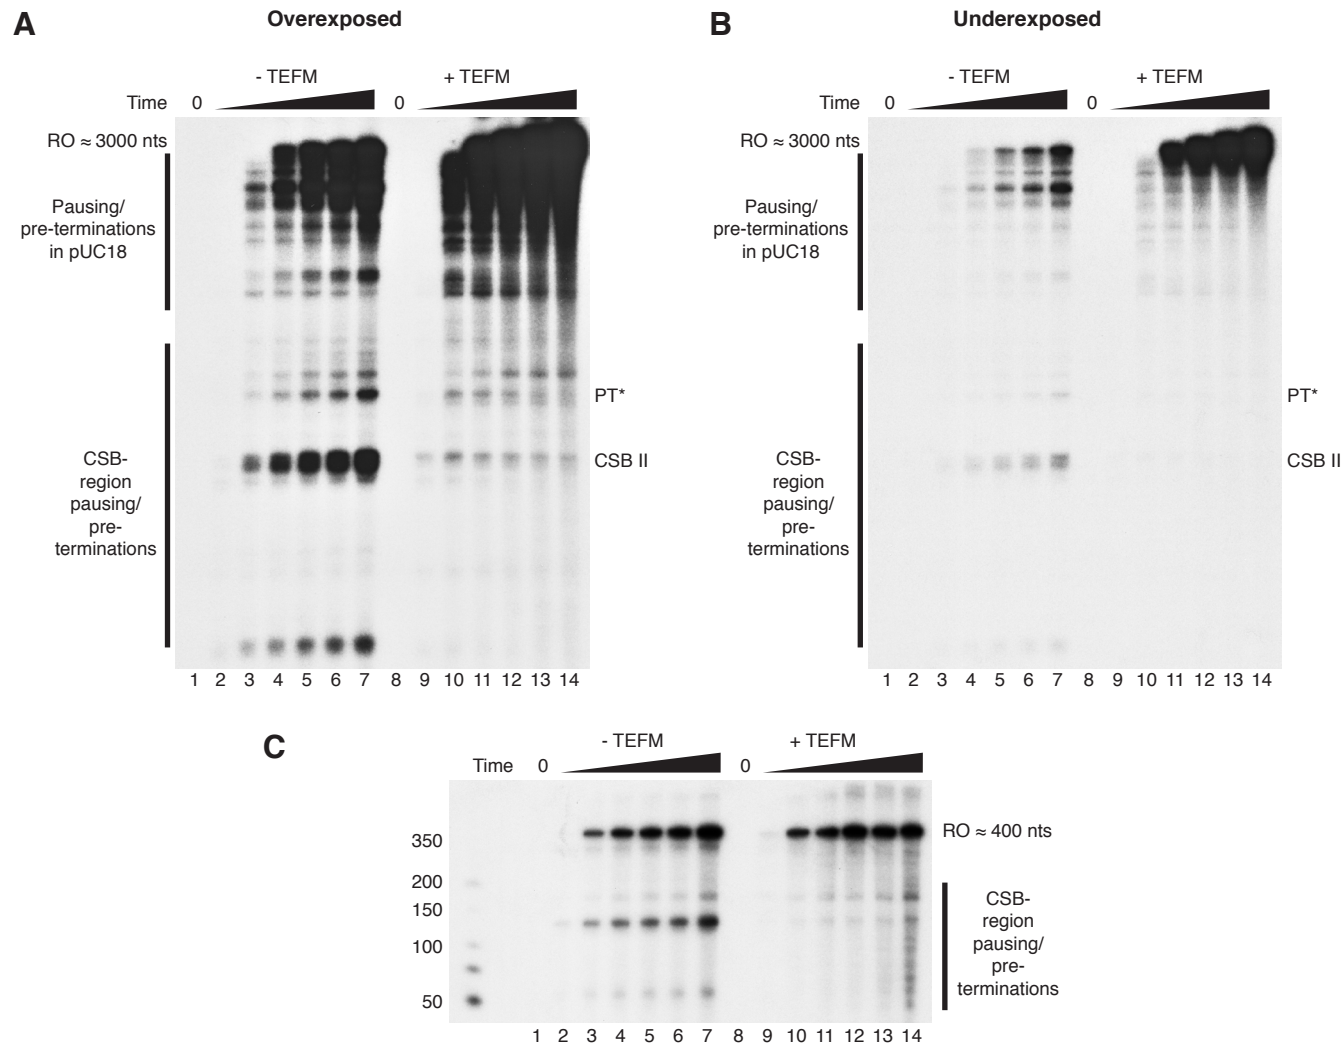

**Figure S3.** *In vitro* transcription from LSP on a 3000 nts **(A+B)** or a 400 nts **(C)** run-off template at different time points (0, 3, 6, 9, 12, 15 and 30 minutes) in the absence (lanes 1-7) or presence (lanes 8-14) of 40 nM TEFM. CSB region transcripts as well as run-off transcripts are indicated. For **(A)** and **(B)** the experiment is the same as in Figure 3A, but the entire films are displayed with **(A)** overexposed and **(B)** underexposed.

## Supplementary Figure S4

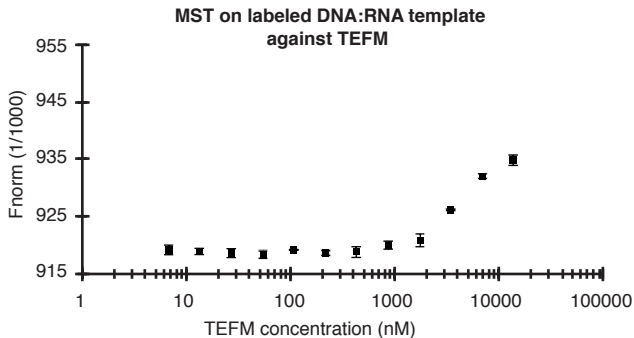

**Figure S4.** MST as in Figure 3E but against altering concentrations of TEFM instead of POLRMT. The binding affinity between TEFM and the DNA:RNA template was too low for  $K_d$  calculations and only at concentrations above 2000 nM any binding was observed. Since no bound state could be estimated the y values are displayed in change in thermophoresis and temperature jump,  $F_{\text{norm}}$  (1/1000), instead of fraction bound.

## Supplementary Figure S5

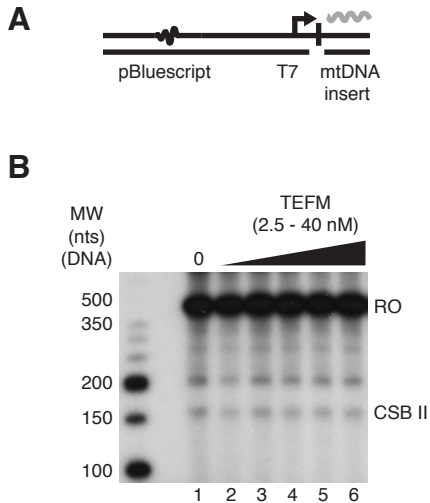

**Figure S5.** TEFM is a POLRMT specific transcription elongation factor. **(A)** Cartoon of the template used for T7 transcription composed of the pBluescript plasmid with an insert containing the CSB region of human mtDNA after the T7 promoter. Expected run-off product is approximately 500 nts and the CSB II product is expected to be 150 nts. **(B)** *In vitro* transcription with T7 RNAP and TEFM on the template described in panel **A**. No TEFM was added to the reaction in lane 1 and increasing concentrations of human TEFM was added in lanes 2-6 (2.5, 5, 10, 20, 40 nM respectively). The CSB II and run-off transcripts as well as molecular weight marker (LMW ladder, New England Biolabs) are indicated.
